# Supplementary material for: Prevalence of Involvement in the Criminal Justice System During Severe Mania and Associated Symptomatology
Source: Atypon-hosted journal article supplement (doi:10.1176/appi.ps.201100174), 2012-01-01
Supplement: pss6301_33_ds.pdf [file pss6301_33_ds.pdf]

AUDADIS assessment of *DSM-IV* criterion B symptoms for most severe manic episode

| <p>AUDADIS question stem:<br/> <i>During that time when (you were the most excited, elated or hyper/you felt the most irritable or easily annoyed), did you...</i></p>                                                                                                                                                                                                                            | <p>DSM-IV criterion B symptoms</p>                                                                                                                                                                               |
|---------------------------------------------------------------------------------------------------------------------------------------------------------------------------------------------------------------------------------------------------------------------------------------------------------------------------------------------------------------------------------------------------|------------------------------------------------------------------------------------------------------------------------------------------------------------------------------------------------------------------|
| <p><i>1. Feel that you were an unusually important person or that you had special gifts, powers, or abilities to do things that most other people couldn't do?</i></p>                                                                                                                                                                                                                            | <p>Inflated self-esteem or grandiosity</p>                                                                                                                                                                       |
| <p><i>2. Need much less sleep than usual?</i></p>                                                                                                                                                                                                                                                                                                                                                 | <p>Decreased need for sleep</p>                                                                                                                                                                                  |
| <p><i>3a. Find you were more talkative than usual?</i><br/> OR<br/> <i>3b. Talk so fast that people had trouble understanding you or couldn't get a word in edgewise?</i></p>                                                                                                                                                                                                                     | <p>Hyper-talkative or pressured speech</p>                                                                                                                                                                       |
| <p><i>4a. Find that your thoughts raced so fast that you couldn't keep track of them?</i><br/> OR<br/> <i>4b. Find that your thoughts raced so fast that it was hard to follow your own thoughts?</i></p>                                                                                                                                                                                         | <p>Racing thoughts<br/> OR<br/> Flight of ideas</p>                                                                                                                                                              |
| <p><i>5. Have trouble concentrating because little things going on around you easily got you off track?</i></p>                                                                                                                                                                                                                                                                                   | <p>Distractibility</p>                                                                                                                                                                                           |
| <p><i>6a. Become more active than usual, at work, at home, or in pursuing other interests?</i><br/> <i>6b. Become more sexually active than usual or have sex with people you normally wouldn't be interested in?</i><br/> OR<br/> <i>6c. Feel so restless that you fidgeted, paced, or couldn't sit still?</i><br/> <i>6d. Become so physically restless that it made you uncomfortable?</i></p> | <p>Increase in goal-directed activity (either socially, at work or school, or sexually)<br/> OR<br/> Psychomotor agitation</p>                                                                                   |
| <p><i>7a. Do anything unusual that could have gotten you into trouble - like buying things you couldn't afford or didn't need, making foolish decisions about money, or driving recklessly?</i><br/> OR<br/> <i>7b. Do anything that you later regretted - like spending time with people you normally wouldn't be interested in?</i></p>                                                         | <p>Excessive involvement in pleasurable activities that have a high potential for painful consequences (e.g., engaging in unrestrained buying sprees, sexual indiscretions, or foolish business investments)</p> |
